# Supplementary material for: Plasma Levels of Omega-3 and Omega-6 Derived Oxylipins Are Associated with Fecal Microbiota Composition in Young Adults
Source: MDPI journal article supplement (doi:10.3390/nu14234991), 2022-11-24
Supplement: s1 [file s1]

**Plasma levels of omega-3 and omega-6 derived oxylipins are associated with fecal microbiota composition in young adults**

## **SUPPLEMENTARY METHODS**

### **1. Determination of the plasma levels of oxylipins**

#### *1.1. Sample preparation*

The sample preparation was performed under ice-cold conditions to prevent analyte degradation, except for the evaporation step<sup>1</sup>. Target analytes were extracted using liquid-liquid extraction. Before the extraction, 150  $\mu$ L of plasma sample was transferred into 1.5 mL Eppendorf tubes and mixed with 5  $\mu$ L of an antioxidant solution composed of 0.4 mg/mL of butylated hydroxytoluene (BHT) and 10  $\mu$ L of an internal standard mix containing the isotopically-labeled analogs (**Table S2**). Then, 150  $\mu$ L of buffer solution (0.2 M citric acid and 0.1 M disodium hydrogen phosphate at pH 4.5) were added, followed by the addition of 1000  $\mu$ L of the extraction solvent composed of methyl tert-butyl ether (MTBE) and butanol (50:50, v/v). The samples were then mixed for 5 min using a bullet blender (Next Advance, Averill Park, NY) and centrifuged (16,000 g, 10 min, 4 °C). Next, 900  $\mu$ L of supernatants were transferred to new 1.5 mL Eppendorf tubes and evaporated to dryness using a SpeedVac system at room temperature. The dry residues were reconstituted in 50  $\mu$ L of a mixture of methanol:acetonitrile (70:30, v/v), and the reconstituted samples were centrifuged (16,000 g, 10 min, 4 °C). Finally, 40  $\mu$ L of supernatant was transferred into autosampler vials with glass inserts for injection in the LC-MS/MS system.

#### *1.2. Liquid chromatography - tandem mass spectrometry analysis*

LC-MS/MS analysis was performed as previously described<sup>2</sup>. Briefly, the extracted samples were analyzed using a Shimadzu LC system (Shimadzu Corporation, Kyoto, Japan) coupled with a SCIEX QTRAP 6500+ mass spectrometer (SCIEX, Framingham, MA). Separation was carried out with a BEH C18 column (50 mm  $\times$  2.1 mm, 1.7  $\mu$ m) from Waters Technologies (Milford, MA, USA) kept at 40°C. The mobile phase consisted

of 0.1% acetic acid in water (A), 0.1% acetic acid in acetonitrile/methanol (90:10, v/v, B) and 0.1% acetic acid in isopropanol (C). Electrospray ionization was performed in negative mode. For the MS/MS acquisition, a selected reaction mode (SRM) was used. SRM transitions were individually optimized for targeted analytes and respective internal standards using standard solutions.

### *1.3. Data pre-processing*

For each target compound, SCIEX OS-MQ Software was used to calculate the ratio between its peak area and the peak area of its respective internal standard. The quality of the data was monitored using regular injection of quality control (QC) samples, consisting of blank plasma samples. QC samples were used to correct for between batch variations, using the in-house developed mzQuality workflow (available at <http://www.mzQuality.nl>)<sup>3</sup>. Relative standard deviations (RSDs) were calculated for the analytes present in the QC samples, analytes with RSD >30% were excluded (**Table S1**).

## **2. Fecal collection and DNA extraction**

### *2.1. Sequencing*

DNA was amplified by PCR, using the following primer pairs: 16S Amplicon PCR Forward Primer: 5'CCTACGGGNGGCWGCAG; and 16S Amplicon PCR Reverse Primer: 5'GACTACHVGGGTATCTAATCC targeting the V3 and V4 hypervariable regions. PCR assays were conducted in a final volume of 25  $\mu$ L including: 12.5  $\mu$ L of the 2X KAPA HiFi Hotstart prepared mixture (KAPA Biosystems, Woburn, MA, USA), 5  $\mu$ L of each forward and reverse primer (1  $\mu$ M), and 2.5  $\mu$ L of DNA extracted (10 ng). PCR program: (i) denaturation at 95°C for 3 min, (ii) 8 denaturation cycles at 95°C for 30 s, (iii) annealing at 55°C for 30 s, (iv) elongation at 72°C for 30 s, (v) a final extension at 72°C for 5 min. Next, AMPure XP microspheres (Beckman Coulter, Indianapolis, IN, USA) were used to purify the 16S V3 and V4 amplicon away from free primers and

primer-dimer species. For the PCR index step, we used the Nextera XT index kit (Illumina, San Diego, CA, USA) to tag DNA with the sequencing adapters. The pooled PCR products were purified using AMPure XP balls (Beckman Coulter, Indianapolis, IN, USA) before quantification. The amplicons were sequenced in a MiSeq (Illumina, San Diego, CA, USA), using the Illumina MiSeq paired-end sequencing system (2x300nt) (Illumina, San Diego, CA, USA).

## 2.2. Bioinformatics

The “*dada2*” package version 1.10.1 in *R* software<sup>4</sup> was used for merging and filtering raw sequences (FastQ files). All samples that were above the 10,000 reads cut-off point were considered valid for the analyses. The samples were resampled to an equal sequencing depth using the “*phyloseq*”<sup>5</sup> package in *R* software (30,982 reads), obtaining a total of 11,158 different phylotypes.

Phylotypes were assigned to their specific taxonomic affiliation (from phylum to genus) based on the naive Bayesian classification with a pseudo-bootstrap threshold of 80%<sup>5</sup> using the “*Classifier*” function in Ribosomal Data Project (RDP)<sup>6</sup>. We obtained 16 phyla, which include 209 genera. For the main analysis, we performed the analyses if the average of the sequence abundance was higher than 1% and we used relative abundances (reads percent of each phylotype relative to the total number of reads).

## REFERENCES

1. Di Zazzo A, Yang W, Coassin M, et al. Signaling lipids as diagnostic biomarkers for ocular surface cicatrizing conjunctivitis. *J Mol Med*. 2020;98(5):751-760. doi:10.1007/s00109-020-01907-w
2. Jurado-Fasoli L, Di X, Kohler I, et al. Omega-6 and omega-3 oxylipins as potential markers of cardiometabolic risk in young adults. *Obesity (Silver*

*Spring*). 2022;30(1):50-61. doi:10.1002/OBY.23282

3. Van Der Kloet FM, Bobeldijk I, Verheij ER, Jellema RH. Analytical error reduction using single point calibration for accurate and precise metabolomic phenotyping. *J Proteome Res*. 2009;8(11):5132-5141. doi:10.1021/pr900499r
4. R Core Team. R: A Language and Environment for Statistical Computing. Published online 2019.
5. McMurdie PJ, Holmes S. Phyloseq: An R Package for Reproducible Interactive Analysis and Graphics of Microbiome Census Data. *PLoS One*. 2013;8(4). doi:10.1371/journal.pone.0061217
6. Cole JR, Wang Q, Fish JA, et al. Ribosomal Database Project: Data and tools for high throughput rRNA analysis. *Nucleic Acids Res*. 2014;42(D1). doi:10.1093/nar/gkt1244

**Table S1** Overview of the labeled internal standards used in the LC-MS/MS method.

| Abbreviation                                                   | Name (International Union of Pure and Applied Chemistry, IUPAC)                                                                                      |
|----------------------------------------------------------------|------------------------------------------------------------------------------------------------------------------------------------------------------|
| Arachidonic acid-d <sub>8</sub> (C20:4-w6-d <sub>8</sub> )     | 5Z,8Z,11Z,14Z-eicosatetraenoic acid-d <sub>8</sub>                                                                                                   |
| Docosahexaenoic acid-d <sub>5</sub> (C22:6-w3-d <sub>5</sub> ) | 4Z,7Z,10Z,13Z,16Z,19Z-docosahexaenoic acid-d <sub>5</sub>                                                                                            |
| Linoleic acid-d <sub>4</sub> (C18:2-w6-d <sub>4</sub> )        | 9Z,12Z-octadecadienoic acid-d <sub>4</sub>                                                                                                           |
| d <sub>11</sub> -5-iPF <sub>2a</sub> -VI                       | (8β)-5,9α,11α-trihydroxy-prosta-6 <i>E</i> ,14Z-dien-1-oic acid-d <sub>11</sub>                                                                      |
| d <sub>4</sub> -8-iso-PGE <sub>2</sub>                         | 9-oxo-11α,15 <i>S</i> -dihydroxy-(8β)-prosta-5Z,13 <i>E</i> -dien-1-oic acid-d <sub>4</sub>                                                          |
| d <sub>4</sub> -8-iso-PGF <sub>2α</sub>                        | 9α,11α,15 <i>S</i> -trihydroxy-(8β)-prosta-5Z,13 <i>E</i> -dien-1-oic acid-d <sub>4</sub>                                                            |
| d <sub>4</sub> -PGD <sub>2</sub>                               | 9α,15 <i>S</i> -dihydroxy-11-oxo-prosta-5Z,13 <i>E</i> -dien-1-oic acid-d <sub>4</sub>                                                               |
| d <sub>4</sub> -PGF <sub>2α</sub>                              | 9 <i>S</i> ,11 <i>R</i> ,15 <i>S</i> -trihydroxy-5Z,13 <i>E</i> -prostadienoic acid-d <sub>4</sub>                                                   |
| d <sub>9</sub> -PGE <sub>2</sub>                               | 9-oxo-11 <i>R</i> ,15 <i>S</i> -dihydroxy-5Z,13 <i>E</i> -prostadienoic acid-d <sub>9</sub>                                                          |
| d <sub>4</sub> -iPF <sub>2α</sub> -IV                          | (8 <i>S</i> )-10-[(1 <i>R</i> ,2 <i>S</i> ,3 <i>S</i> ,5 <i>R</i> )-3,5-Dihydroxy-2-pentylcyclopentyl]-8-hydroxydeca-5,9-dienoic acid-d <sub>4</sub> |
| d <sub>11</sub> -8,12-iPF <sub>2α</sub> -VI                    | (12α)-5,9α,11α-trihydroxy-prosta-6 <i>E</i> ,14Z-dien-1-oic acid-d <sub>11</sub>                                                                     |
| d <sub>17</sub> -10-Nitrooleate                                | 10-nitro,9Z,12Z-octadecadienoic acid-d <sub>17</sub>                                                                                                 |
| d <sub>11</sub> -14,15-DiHETrE                                 | 14,15-dihydroxy-5Z,8Z,11Z-eicosatrienoic acid-d <sub>11</sub>                                                                                        |
| d <sub>4</sub> -9(S)-HODE                                      | 9 <i>S</i> -hydroxy-10 <i>E</i> ,12Z-octadecadienoic acid-d <sub>4</sub>                                                                             |
| d <sub>4</sub> -LTB <sub>4</sub>                               | 5 <i>S</i> ,12 <i>R</i> -dihydroxy-6Z,8 <i>E</i> ,10 <i>E</i> ,14Z-eicosatetraene-1,20-dioic acid-d <sub>4</sub>                                     |
| d <sub>4</sub> -TXB <sub>2</sub>                               | 9 <i>S</i> ,11,15 <i>S</i> -trihydroxy-thromboxa-5Z,13 <i>E</i> -dien-1-oic acid-d <sub>4</sub>                                                      |
| d <sub>6</sub> -20-HETE                                        | 20-hydroxy-5Z,8Z,11Z,14Z-eicosatetraenoic acid-d <sub>6</sub>                                                                                        |
| d <sub>8</sub> -12(S)-HETE                                     | 12 <i>S</i> -hydroxy-5Z,8Z,10 <i>E</i> ,14Z-eicosatetraenoic acid-d <sub>8</sub>                                                                     |
| d <sub>8</sub> -5(S)-HETE                                      | 5 <i>S</i> -hydroxy-6 <i>E</i> ,8Z,11Z,14Z-eicosatetraenoic acid-d <sub>8</sub>                                                                      |
| d <sub>4</sub> -(+/-)12,13-DiHOME                              | 12,13-dihydroxy-9Z-octadecenoic acid-d <sub>4</sub>                                                                                                  |

**Table S2.** Overview of the detected omega-3 and omega-6 oxylipins, including the variability observed in QC samples (expressed using RSD). Analytes showing an RSD < 30% in the QC samples were kept for further analysis.

|                          | Abbreviation                             | Name                                  | RSD in QC samples |
|--------------------------|------------------------------------------|---------------------------------------|-------------------|
| <i>Omega-3 oxylipins</i> |                                          |                                       |                   |
| <i>ALA-derived</i>       | ALA                                      | $\alpha$ -linolenic acid              | 9.8%              |
|                          | 9-HOTre                                  | 9-hydroxy-octadecatrienoic acid       | 7.6%              |
|                          | 12,13-DiHODE                             | 12,13-dihydroxy-octadecadienoic acid  | 5.8%              |
| <i>EPA-derived</i>       | EPA                                      | Eicosapentaenoic acid                 | 8.5%              |
|                          | 5-HEPE                                   | 5-hydroxy-eicosapentaenoic acid       | 13.1%             |
|                          | 12-HEPE                                  | 12-hydroxy-eicosapentaenoic acid      | 12.1%             |
|                          | 14,15-DiHETE                             | 14,15-dihydroxy-eicosatetraenoic acid | 8.0%              |
|                          | 17,18-DiHETE                             | 17,18-dihydroxy-eicosatetraenoic acid | 9.1%              |
|                          | DPA                                      | Docosapentaenoic acid                 | 14.0%             |
| <i>DHA-derived</i>       | DHA                                      | Docosahexaenoic acid                  | 9.8%              |
|                          | 4-HDoHE                                  | 4-hydroxy-docosahexaenoic acid        | 14.3%             |
|                          | 8-HDoHE                                  | 8-hydroxy-docosahexaenoic acid        | 19.7%             |
|                          | 11-HDoHE                                 | 11-hydroxy-docosahexaenoic acid       | 17.1%             |
|                          | 13-HDoHE                                 | 13-hydroxy-docosahexaenoic acid       | 12.3%             |
|                          | 14-HDoHE                                 | 14-hydroxy-docosahexaenoic acid       | 14.7%             |
|                          | 16-HDoHE                                 | 16-hydroxy-docosahexaenoic acid       | 15.4%             |
|                          | 17-HDoHE                                 | 17-hydroxy-docosahexaenoic acid       | 9.0%              |
|                          | 20-HDoHE                                 | 20-hydroxy-docosahexaenoic acid       | 23.6%             |
|                          | 19,20-EpDPE                              | 19,20-epoxy-docosapentaenoic acid     | 13.5%             |
|                          | 19,20-DiHDPA                             | 19,20-dihydroxy-docosapentaenoic acid | 7.9%              |
| <i>Omega-6 oxylipins</i> |                                          |                                       |                   |
| <i>LA-derived</i>        | LA                                       | Linoleic acid                         | 10.2%             |
|                          | 9-HODE                                   | 9-hydroxy-octadecadienoic acid        | 7.6%              |
|                          | 13-HODE                                  | 13-hydroxy-octadecadienoic acid       | 7.1%              |
|                          | 9,10,13-TriHOME                          | 9,10,13-trihydroxy-octadecenoic acid  | 6.9%              |
|                          | 9,12,13-TriHOME                          | 9,12,13-trihydroxy-octadecenoic acid  | 15.7%             |
|                          | 9,10-EpOME                               | 9,10-epoxy-octadecenoic acid          | 7.8%              |
|                          | 9,10-DiHOME                              | 9,10-dihydroxy-octadecenoic acid      | 7.3%              |
|                          | 12,13-EpOME                              | 12,13-epoxy-octadecenoic acid         | 9.6%              |
|                          | 12,13-DiHOME                             | 12,13-dihydroxy-octadecenoic acid     | 6.7%              |
|                          | 10-NO <sub>2</sub> -LA                   | 10-nitro-linolenic acid               | 13.3%             |
| <i>DGLA-derived</i>      | DGLA                                     | Dihomo- $\gamma$ -linolenic acid      | 23.9%             |
|                          | 8-HETrE                                  | 8-hydroxy-eicosatrienoic acid         | 22.8%             |
|                          | 15-HETrE                                 | 15-hydroxy-eicosatrienoic acid        | 13.5%             |
| <i>AA-derived</i>        | AA                                       | Arachidonic acid                      | 13.4%             |
|                          | PGE <sub>2</sub>                         | Prostaglandin E2                      | 36.0%             |
|                          | TxB <sub>2</sub>                         | Thromboxane B2                        | 6.9%              |
|                          | 12-HHTrE                                 | 12-hydroxy-heptadecatrienoic acid     | 8.1%              |
|                          | 8,12-iPF <sub>2<math>\alpha</math></sub> | 8,12-isoprostane F2alpha              | 7.2%              |
|                          | 5-HETE                                   | 5-hydroxy-eicosatetraenoic acid       | 10.4%             |
|                          | 11-HETE                                  | 11-hydroxy-eicosatetraenoic acid      | 10.7%             |
|                          | 12-HETE                                  | 12-hydroxy-eicosatetraenoic acid      | 11.4%             |
|                          | 15-HETE                                  | 15-hydroxy-eicosatetraenoic acid      | 9.3%              |

|                                                                              |                                |                                                              |       |
|------------------------------------------------------------------------------|--------------------------------|--------------------------------------------------------------|-------|
|                                                                              | 20-HETE                        | 20-hydroxy-eicosatetraenoic acid                             | 9.4%  |
|                                                                              | 5,6-DiHETrE                    | 5,6-dihydroxy-eicosatrienoic acid                            | 9.0%  |
|                                                                              | 8,9-DiHETrE                    | 8,9-dihydroxy-eicosatrienoic acid                            | 9.9%  |
|                                                                              | 11,12-DiHETrE                  | 11,12-dihydroxy-eicosatrienoic acid                          | 8.4%  |
|                                                                              | 14,15-EpETrE                   | 14,15-epoxy-eicosatrienoic acid                              | 19.5% |
|                                                                              | 14,15-DiHETrE                  | 14,15-dihydroxy-eicosatrienoic acid                          | 7.1%  |
|                                                                              | AdrA                           | Adrenic acid                                                 | 22.1% |
| <i>AdrA-derived</i>                                                          | 1a,1b-dihomo-PGF <sub>2α</sub> | 1a,1b-dihomo-9S,11R,15S-trihydroxy-5Z,13E-prostadienoic acid | 22.1% |
| <i>Abbreviations:</i> QC: quality control; RSD: relative standard deviation. |                                |                                                              |       |



**Table S3. Partial Spearman correlation between total omega-3 and omega-6 oxylipins and the relative abundance of fecal microbiota composition at genus level.**

|                                                                                                                                                                                                                                                                                                                                                                         |           | Model 1 |              | Model 2 |              |
|-------------------------------------------------------------------------------------------------------------------------------------------------------------------------------------------------------------------------------------------------------------------------------------------------------------------------------------------------------------------------|-----------|---------|--------------|---------|--------------|
| <b>Omega-3 oxylipins</b>                                                                                                                                                                                                                                                                                                                                                |           |         |              |         |              |
|                                                                                                                                                                                                                                                                                                                                                                         |           | Rho     | P            | Rho     | P            |
| <i>Clostridium</i> cluster IV (%)                                                                                                                                                                                                                                                                                                                                       |           |         |              |         |              |
|                                                                                                                                                                                                                                                                                                                                                                         | Σ Omega-3 | 0.286   | <b>0.009</b> | 0.287   | <b>0.010</b> |
| <i>Sutterella</i> (%)                                                                                                                                                                                                                                                                                                                                                   |           |         |              |         |              |
|                                                                                                                                                                                                                                                                                                                                                                         | Σ Omega-3 | -0.254  | <b>0.022</b> | -0.255  | <b>0.023</b> |
| <b>Omega-6 oxylipins</b>                                                                                                                                                                                                                                                                                                                                                |           |         |              |         |              |
|                                                                                                                                                                                                                                                                                                                                                                         |           | Rho     | P            | Rho     | P            |
| <i>Clostridium</i> cluster IV (%)                                                                                                                                                                                                                                                                                                                                       |           |         |              |         |              |
|                                                                                                                                                                                                                                                                                                                                                                         | Σ Omega-6 | 0.114   | 0.295        | 0.118   | 0.296        |
| <i>Sutterella</i> (%)                                                                                                                                                                                                                                                                                                                                                   |           |         |              |         |              |
|                                                                                                                                                                                                                                                                                                                                                                         | Σ Omega-6 | -0.265  | <b>0.017</b> | -0.265  | <b>0.017</b> |
| <b>Omega-6/omega-3 ratio</b>                                                                                                                                                                                                                                                                                                                                            |           |         |              |         |              |
|                                                                                                                                                                                                                                                                                                                                                                         |           | Rho     | P            | Rho     | P            |
| <i>Clostridium</i> cluster IV (%)                                                                                                                                                                                                                                                                                                                                       |           | -0.256  | <b>0.021</b> | -0.256  | <b>0.022</b> |
| <i>Butyricimonas</i>                                                                                                                                                                                                                                                                                                                                                    |           | -0.238  | <b>0.033</b> | -0.238  | <b>0.033</b> |
| Rho and P values are provided from partial Spearman correlation analyses. Model 1: adjusted for BMI; Model 2: adjusted for BMI, PUFAs and fish intake. The sum (Σ) of omega-3 and omega-6-derived oxylipins were computed from the individual area peak ratio of each oxylipins group. <i>Abbreviations</i> : BMI: body mass index; PUFAs: polyunsaturated fatty acids. |           |         |              |         |              |

**Table S4. Partial Spearman correlation between plasma levels of individual omega-3 and omega-6 oxylipins and the relative abundance of fecal microbiota composition at genus level.**

|                                   | Model 1 |              | Model 2 |              |
|-----------------------------------|---------|--------------|---------|--------------|
| <b>Omega-3 oxylipins</b>          |         |              |         |              |
|                                   | Rho     | P            | Rho     | P            |
| <i>Clostridium</i> cluster IV (%) |         |              |         |              |
| DPA                               | 0.332   | <b>0.003</b> | 0.271   | <b>0.003</b> |
| DHA                               | 0.321   | <b>0.004</b> | 0.262   | <b>0.004</b> |
| 8-HDoHE                           | 0.339   | <b>0.002</b> | 0.300   | <b>0.002</b> |
| 13-HDoHE                          | 0.349   | <b>0.002</b> | 0.328   | <b>0.002</b> |
| 19,20-DiHDPA                      | 0.237   | <b>0.035</b> | 0.160   | <b>0.035</b> |
| <i>Sutterella</i> (%)             |         |              |         |              |
| ALA                               | -0.245  | <b>0.029</b> | -0.224  | <b>0.029</b> |
| EPA                               | -0.260  | <b>0.020</b> | -0.241  | <b>0.020</b> |
| 5-HEPE                            | -0.363  | <b>0.001</b> | -0.348  | <b>0.001</b> |
| DHA                               | -0.231  | <b>0.039</b> | -0.196  | <b>0.049</b> |
| 4-HDoHE                           | -0.287  | <b>0.010</b> | -0.267  | <b>0.010</b> |
| 19,20-DiHDPA                      | -0.228  | <b>0.042</b> | -0.202  | <b>0.042</b> |
| <b>Omega-6 oxylipins</b>          |         |              |         |              |
|                                   | Rho     | P            | Rho     | P            |
| <i>Clostridium</i> cluster IV (%) |         |              |         |              |
| 9,10-EpOME                        | -0.193  | 0.087        | -0.198  | 0.087        |
| 12,13-EpOME                       | -0.257  | <b>0.021</b> | -0.250  | <b>0.021</b> |
| TxB <sub>2</sub>                  | 0.213   | 0.058        | 0.159   | 0.058        |
| 12-HHTrE                          | 0.216   | 0.054        | 0.168   | 0.054        |
| <i>Sutterella</i> (%)             |         |              |         |              |
| LA                                | -0.292  | <b>0.009</b> | -0.278  | <b>0.009</b> |
| DGLA                              | -0.260  | <b>0.020</b> | -0.241  | <b>0.020</b> |
| AA                                | -0.253  | <b>0.024</b> | -0.233  | <b>0.024</b> |
| 5-HETE                            | -0.366  | <b>0.001</b> | -0.351  | <b>0.001</b> |
| AdrA                              | -0.311  | <b>0.005</b> | -0.294  | <b>0.005</b> |

Rho and P values are provided from partial Spearman correlation analyses. Model 1: adjusted for body mass index; Model 2: adjusted for body mass index, PUFAs and fish intake. *Abbreviations:* BMI: body mass index; PUFAs: polyunsaturated fatty acids.

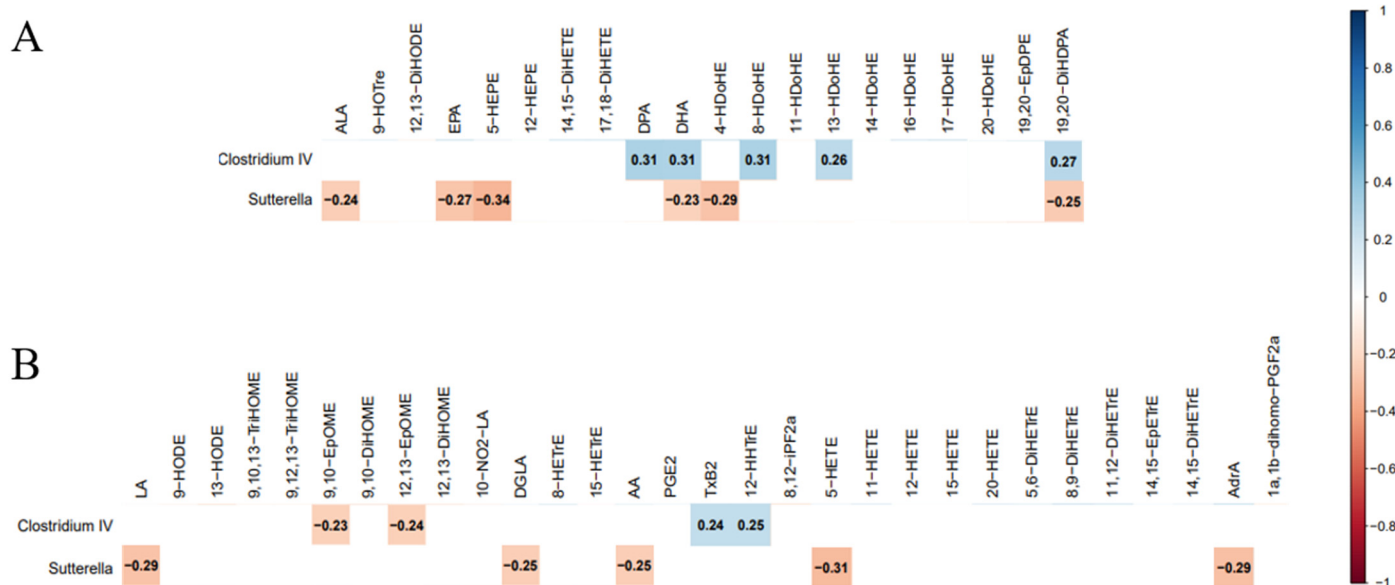

**Figure S1: Spearman correlations between plasma levels of individual omega-3 (Panel A) and omega-6 (Panel B) oxylipins and the abundance relative of *Clostridium IV* and *Sutterella* genera.** Boxes only represent the statistically significant ( $P < 0.05$ ) correlations and the value within the boxes show the Spearman correlation coefficient. Blue boxes represent positive correlations whereas red boxes indicate negative correlations.
